# Supplementary material
Source: PubMed Central journal article supplement (PMC4464742)
Supplement: supp_WNL.0000000000001656_Table_e-1.pdf [file supp_WNL.0000000000001656_Table_e-1.pdf]

| Implant | age at time of surgery, gender | site of implant | seizure onset region | sMRI abnormality | location of surgery | pathology             | outcome | follow up interval (months) |
|---------|--------------------------------|-----------------|----------------------|------------------|---------------------|-----------------------|---------|-----------------------------|
| 1       | 13F                            | R F,T           | R T                  | R MTS            | R ATL               | HS                    | IA      | 14                          |
| 2**     | 32M                            | L T,O           | L T,O junction       | L T cav-mal, MTS | L Lat. T            | CH                    | IVB     | 9                           |
| 3†      | 33M                            | L T,O,MT        | T, MT                | L T cav-mal, MTS | L Lat. T, A+H       | HS                    | IVB     | 13                          |
| 4       | 50M                            | BL T, R F       | R MF                 | Rt. F enc-mal    | R ATL+ inf F,       | gliosis               | IID     | 20                          |
| 5       | 50F                            | L T,P,O,IH      | L O                  | L O enc-mal      | L T, O              | no chronic findings   | IIB     | 51                          |
| 6       | 30F                            | R T,P,O,IH      | R P                  | none             | R P                 | CG                    | IIIA    | 65                          |
| 7       | 45F                            | L T,O           | L T                  | L encmal         | L ATL               | CG                    | IA      | 34                          |
| 8       | 16M                            | R F,P,T,O       | R T                  | none             | R T                 | CG                    | IVB     | 78                          |
| 9       | 33F                            | L T,O           | L T                  | none             | L ATL               | CA1 gliosis           | IA      | 55                          |
| 10      | 20F                            | R P,T,O,I       | R O, MT              | none             | R ATL+O             | hippocampal gliosis   | IA      | 54                          |
| 11      | 10F                            | R O, IH         | R MO                 | R MO piloastro   | right focal O       | pilocytic astrocytoma | IIB     | 73                          |
| 12      | 44F                            | L F,T           | L T                  | L F enc-mal      | L ATL               | CG                    | IVB     | 10                          |
| 13      | 33F                            | R F,T,O         | R T                  | R MF FCD         | R ATL               | CG                    | IA      | 23                          |
| 14      | 18F                            | R T,P,O         | R T,P,O junction     | none             | R T, P              | normal                | IA      | 74                          |
| 15      | 29F                            | L F,T,P         | L T,O                | FCD, SEN         | L T, O              | CG                    | 1A      | 48                          |
| 16      | 25M                            | L F,T           | L T                  | L T DNET         | L T                 | DNET                  | III     | 30                          |
| 17      | 13F                            | R F,T,P,O,I     | R O                  | R encmal         | R T, F, P(MST)      | gliosis               | IVB     | 63                          |
| 18      | 15F                            | L F,T,IH        | LMF                  | none             | L MF                | CG                    | IA      | 59                          |
| 19      | 29M                            | R F,T,P         | R F                  | R F DNET         | R F                 | DNET                  | IV      | 17                          |
| 20      | 60M                            | BL F, BL T      | R IF                 | R F pilo-astro   | R OF                | pilo astro            | IV      | 31                          |
| 21      | 21M                            | R F,T,P,IH      | R F                  | none             | R F                 | microdysgenesis       | ID      | 30                          |
| 22      | 37M                            | R F,T,P,IH      | R F                  | none             | R F                 | CG                    | II      | 48                          |

| Implant | age at time of surgery, gender | site of implant | seizure on-set region | sMRI abnormality        | location of surgery | pathology                | out-come | follow up interval (months) |
|---------|--------------------------------|-----------------|-----------------------|-------------------------|---------------------|--------------------------|----------|-----------------------------|
| 23      | 33F                            | L F,T,P         | L T                   | diffuse heterotopia     | L ATL               | CG                       | IIB      | 60                          |
| 24      | 54M                            | R F,T,P         | R T                   | none                    | L ATL               | no chronic findings      | IA       | 30                          |
| 25      | 46F                            | R F,P,IH        | R Ant. C              | R P cav mal             | R F,C               | no tissue provided       | IIB      | 14                          |
| 26      | 17M                            | R T,P,O,IH      | R post. C, P          | FCD                     | R MF, post. C, P    | FCD IIB                  | IIB      | 12                          |
| 27      | 18F                            | R F,T,P,IH      | R F,P                 | R encmal                | R F,P               | normal                   | IIB      | 41                          |
| 28**    | 9F                             | R F,T,P         | R F                   | none                    | R F                 | FCD, no balloon cells    | IV       | 11                          |
| 29      | 17M                            | R F,P BL IH     | R F                   | nonspecific             | R F                 | hyaline astrocypathology | IA       | 24                          |
| 30      | 41M                            | R F,T,P         | R P                   | R P encmal              | R T,P               | CG                       | IB       | 46                          |
| 31      | 34F                            | L T,F           | L MT                  | nonspecific             | L ATL               | chronic vascular changes | IV       | 11                          |
| 32      | 16F                            | R F,T,P         | R F,T                 | R MTS                   | R F, T              | normal                   | III      | 16                          |
| 33      | 22M                            | L F,T           | L MT                  | L MTS                   | L ATL               | HS, CG                   | IA       | 12                          |
| 34      | 20F                            | L P             | L P                   | L P AVM                 | L P                 | CG                       | IA       | 47                          |
| 35      | 47M                            | L F, R F, IH    | L IH                  | parasagittal meningioma | L C                 | no tissue provided       | IA       | 13                          |
| 36      | 32M                            | R F,P           | R P                   | R P FCD                 | R P                 | FCD IIB                  | IA       | 30                          |
| 37      | 34F                            | L F,T,P         | L F                   | none                    | L F                 | FCD IIB                  | IA       | 28                          |
| 38      | 36F                            | L F,P, IH       | L, P,IH               | none                    | L P, IH             | normal                   | III      | 28                          |
| 39      | 27M                            | L F,P           | L F                   | L F FCD                 | L F                 | FCD IIB                  | IA       | 23                          |
| 40      | 27M                            | R F,T,P,IH      | L P, IH               | none                    | L P, IH             | FCD IIA                  | III      | 22                          |
| 41      | 25F                            | R F,T,P,O       | R T                   | none                    | R T                 | FCD IIB                  | IA       | 21                          |
| 42      | 32M                            | L F,P           | L F                   | L F FCD                 | L F                 | FCD IIB                  | IA       | 18                          |
| 43      | 33F                            | R F,P           | R P                   | R P FCD                 | R P                 | FCD IIB                  | IA       | 16                          |
| 44      | 33F                            | R P,T,O         | R P                   | R P DNET                | R P                 | DNET                     | IA       | 13                          |
| 45      | 39M                            | L P             | L                     | L P cav mal             | R P                 | CH                       | 2D       | 12                          |
| 46      | 20M                            | L F,T           | L T                   | none                    | L T                 | CG                       | IA       | 19                          |

**Table e-1:** Patient information for the study population. Outcomes are given according to Engel classification. Pathology findings related to acute effects of surgical electrode implantation, e.g. reactive gliosis, are not included. Pathology reports describing only acute changes are listed as “no chronic findings”. Abbreviations include: L = left, R = right, B = bilateral, Post = posterior, F = frontal, T = temporal, P = parietal, O = occipital, M = mesial, IH = interhemispheric, I = insular, C = cingulate, MTS=mesial temporal sclerosis, ATL = anteromesial temporal lobectomy, HS = hippocampal sclerosis, EncMal=encephalomalacia, FCD = focal cortical dysplasia, SEN = subependymal nodular heterotopia, DNET = dysembryoplastic neuroepithelial tumor, AVM = arteriovenous malformation, CH = cavernous hemangioma, CavMal = cavernous malformation, CG = Chaslin’s marginal gliosis. MST = multiple subpial transections. \* lost to follow up, \*\* patient underwent another epilepsy surgery at the end of the follow-up period, ‡ implants #2 and #3 in the same patient.
